# Supplementary material
Source: PubMed Central journal article supplement (PMC2768943)
Supplement: tpc.109.068536_1.pdf [file tpc.109.068536_1.pdf]

Supplemental data. Kühn et al. (2009). Phage-type RNA polymerase RPOTmp performs gene-specific transcription in mitochondria of *Arabidopsis thaliana*.

**A**

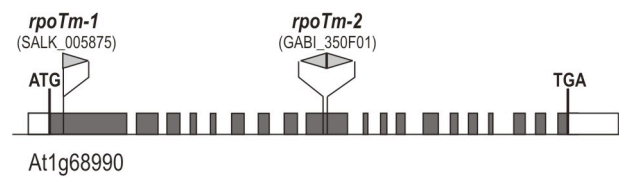

**B**

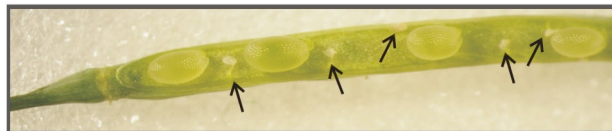

**C**

Self-pollination of plants heterozygous for a disrupted *rpoTm* allele:

| Genotype of heterozygous parent | Germination | Heterozygous Progeny |
|---------------------------------|-------------|----------------------|
| <i>RPOTm</i> / <i>rpoTm-1</i>   | 100%        | 24/71 (34%)          |
| <i>RPOTm</i> / <i>rpoTm-2</i>   | 100%        | 24/72 (33%)          |

Reciprocal backcrosses:

| Female                        | Male                          | Germination | Heterozygous Progeny |
|-------------------------------|-------------------------------|-------------|----------------------|
| <i>RPOTm</i> / <i>RPOTm</i>   | <i>RPOTm</i> / <i>rpoTm-1</i> | 100%        | 25/96 (26%)          |
| <i>RPOTm</i> / <i>rpoTm-1</i> | <i>RPOTm</i> / <i>RPOTm</i>   | 100%        | 27/96 (28%)          |
| <i>RPOTm</i> / <i>RPOTm</i>   | <i>RPOTm</i> / <i>rpoTm-2</i> | 100%        | 9/96 (9%)            |
| <i>RPOTm</i> / <i>rpoTm-2</i> | <i>RPOTm</i> / <i>RPOTm</i>   | 100%        | 35/96 (36%)          |

**Supplemental Figure 1.** Lethality of loss of RPOTm.

(A) *RPOTm* gene organisation and positions of T-DNA insertions in two *rpoTm* mutant alleles *rpoTm-1* (SALK\_005875, obtained from the ABRC stock centre) and *rpoTm-2* (GABI\_350F01, obtained from GABI-Kat). *RPOTm* gene exons are represented as boxes (dark grey, coding sequences; white, untranslated regions). Grey arrowheads indicate T-DNA insertions pointing towards the T-DNA left border. Through PCR with primers annealing to T-DNA borders and their flanking *RPOTm* sequence, the insertion in *rpoTm-2* was found to be present as inverted repeat of the T-DNA, while *rpoTm-1* carried a single insertion. Insertion sites were confirmed by sequencing of PCR products.

(B) Silique of an *RPOTm* / *rpoTm-1* heterozygous plant showing aborted ovules/embryos (arrows). We were unable to obtain plants homozygous for a disrupted *rpoTm* allele.

(C) Segregation analysis of *rpoTm* alleles supporting lethality of the loss of RPOTm and reduced transmission of *rpoTm* alleles. Following self-pollination of *RPOTm* / *rpoTm* heterozygous plants and reciprocal backcrosses of heterozygous plants with wild-type plants (Col-0), progenies were analysed for their genotypes at At1g68990, and the frequency of heterozygous progeny was determined. Observed frequencies differed significantly from i) frequencies expected for lethality of *rpoTm* / *rpoTm* embryos but complete *rpoTm* gamete viability and ii) frequencies expected for male *rpoTm* gamete lethality but female *rpoTm* gamete viability and *vice versa* ( $P < 0.01$ ; chi square test of independence). Therefore, transmission of *rpoTm* alleles by both male and female gametes is reduced, which could be due to decreased male and female *rpoTm* gamete fitness, partial gamete lethality or decreased fitness of heterozygous embryos.

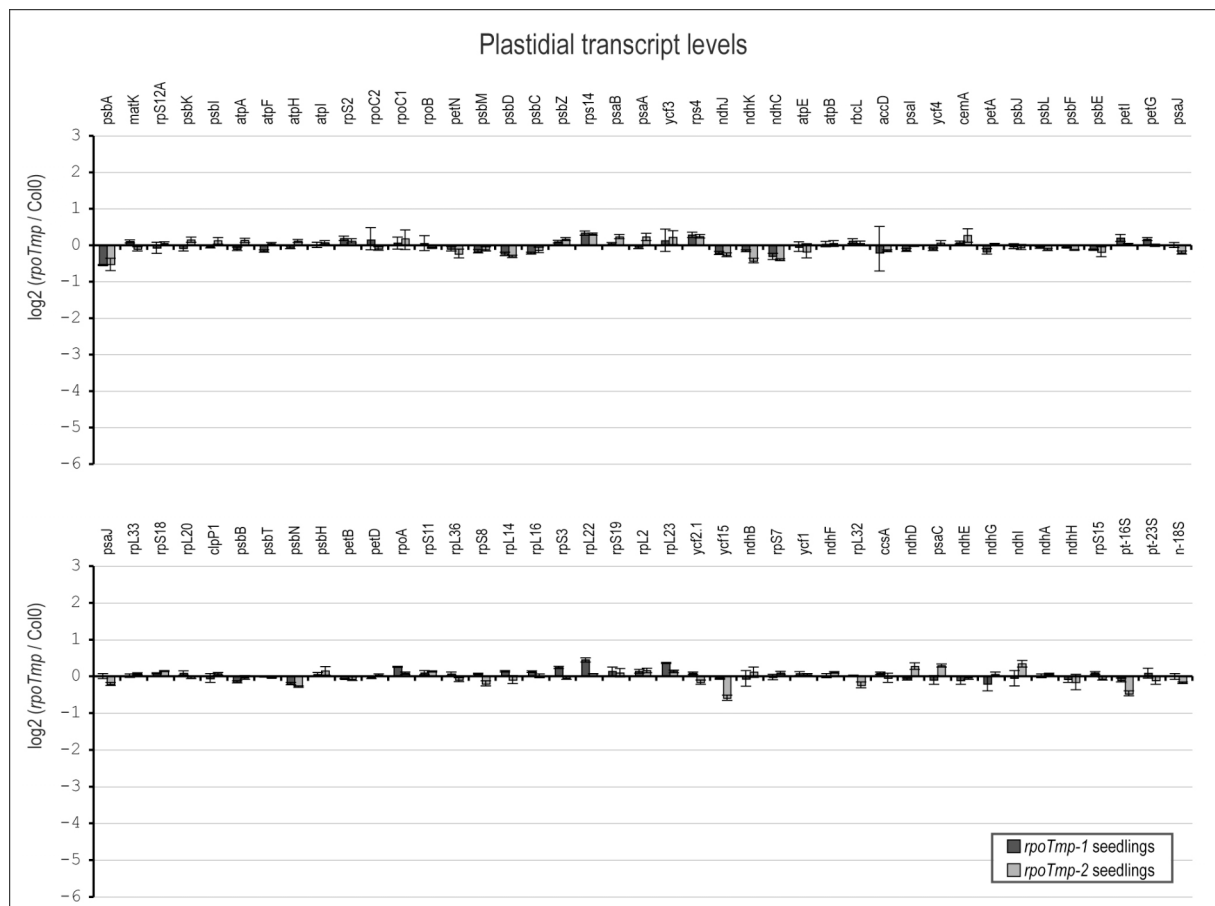

**Supplemental Figure 2.** Plastidial steady-state transcript levels in *rpoTnp* mutants.

Transcript levels are depicted as the  $\log_2$  ratio of transcript levels in mutants compared with levels in wild-type plants (Col-0). Transcript abundances of all plastidial protein-encoding and rRNA genes were determined by qRT-PCR in both mutant and wild-type seedlings using the protocol and primers described earlier (Falcon de Longevialle, A., Hendrickson, L., Taylor, N.L., Delannoy, E., Lurin, C., Badger, M., Millar, A.H. and Small, I. (2008) The pentatricopeptide repeat gene *OTP51* with two LAGLIDADG motifs is required for the *cis*-splicing of plastid *ycf3* intron 2 in *Arabidopsis thaliana*. *Plant J*, **56**, 157-168.). Three technical replicates were averaged per genotype; standard errors are indicated. No differences between mutant and wild-type transcript levels were seen.

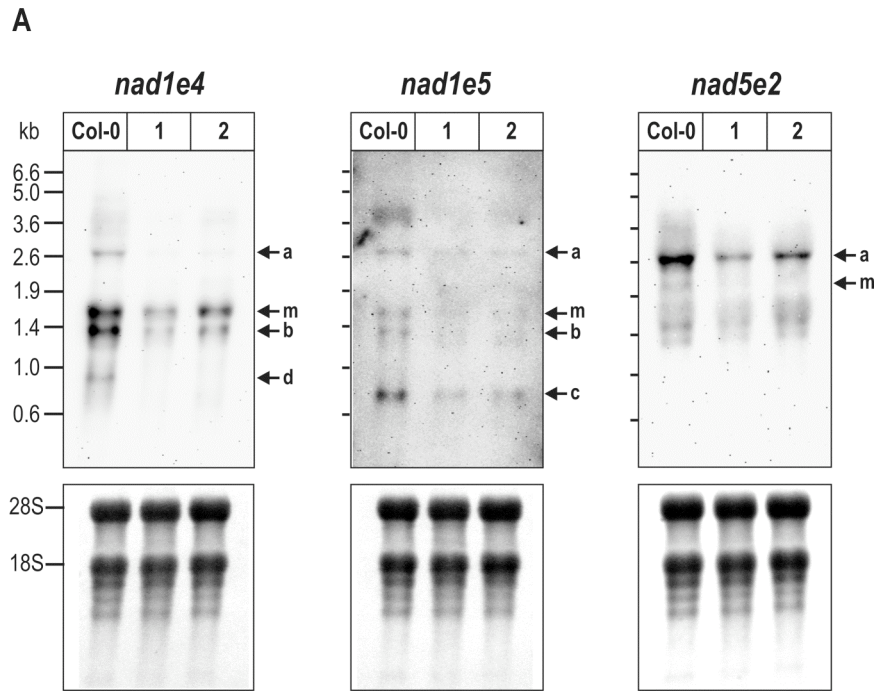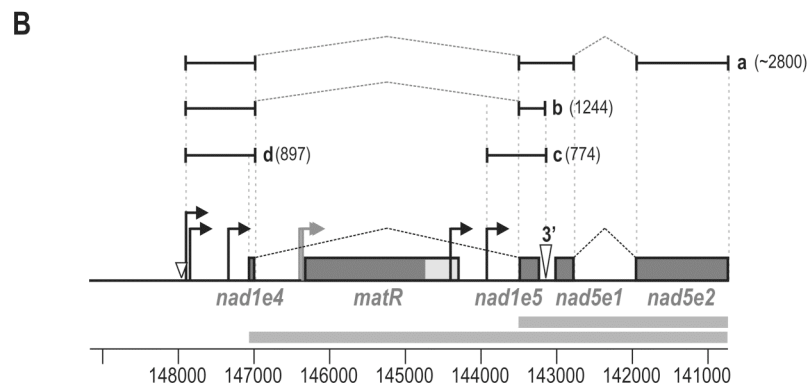

**Supplemental Figure 3.** RNA gel blot hybridizations with probes specific to exons *nad1e4*, *nad1e5* and *nad5e2*.

(A) Probes were hybridized to 10  $\mu$ g of filter-immobilized total leaf RNA isolated from *rpoTnp-1* (lanes 1), *rpoTnp-2* (2) and wild-type (Col-0) seedlings (upper panels). RNA size markers were run alongside samples; marker sizes are indicated. Signals corresponding in size to expected mature mRNAs are indicated by arrows and labeled m. Incompletely processed transcript species are labeled a, b, c and d according to transcript identities as laid out in (B). All identified transcripts are reduced in abundance in mutants compared to the wild type. The greater part of signals corresponds to incompletely processed RNAs. The same filters were stained with methylene blue and are shown as a loading control in lower panels. Slightly more RNA was loaded for *rpoTnp-2* in the *nad1e4* and *nad5e2* blots, which could explain the slightly stronger signals in comparison with *rpoTnp-1*.

(B) Map of mtDNA region comprising *nad1e4*, *matR*, *nad1e5*, *nad5e1* and *nad5e2* as shown in Figure 6A. The *matR* domain X coding region, which in maize mitochondria is transcribed from an additional promoter (Farre, J.C., and Araya, A. (1999). The *mat-r* open reading frame is transcribed from a non-canonical promoter and contains an internal promoter to co-transcribe exons *nad1e* and *nad5III* in wheat mitochondria. *Plant Mol Biol* 40, 959-967.), is highlighted in light grey. The positions of transcripts detected in (A) are indicated above the map by horizontal lines labelled with identification letters a, b, c and d, and expected transcript sizes. Sizes have been inferred from an indicated transcript 3' end (triangle) defined by Forner et al. (2007) and from our identification of primary transcript 5' ends mapping to *Pnad1e4-838* and *Pnad1e5-427*. Splicing of transcripts a and b is indicated by dashed bent lines between exons.

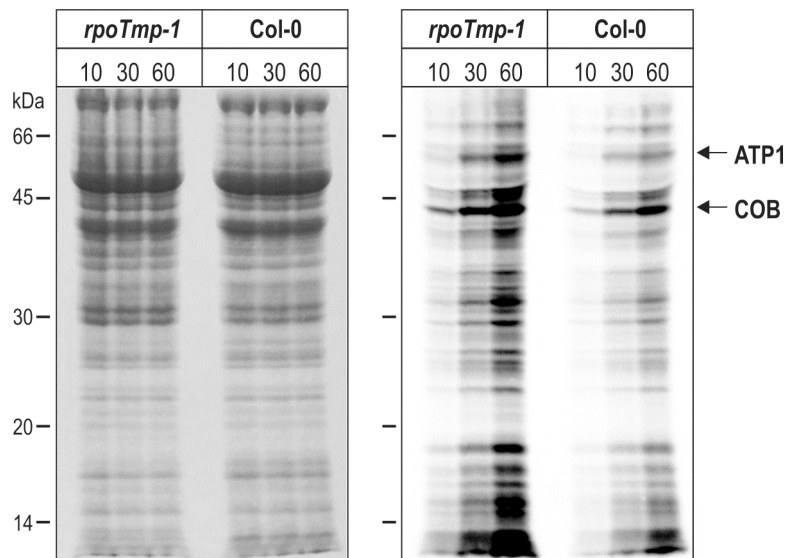

**Supplemental Figure 4.** In organello protein synthesis by mitochondria isolated from *rpoTmp* and wild-type plants.

Coomassie-stained gel (left) and autoradiogram (right) of proteins synthesized in organello for 10, 30 and 60 minutes by mitochondria isolated from *rpoTmp-1* and wild-type (Col-0) rosettes and resolved by SDS-PAGE on a 12% polyacrylamide gel. In organello protein synthesis assays were done as described by Giegé et al. (2005). Two major bands in the autoradiogram have been assigned to ATP1 and COB according to the labelled protein profiles shown by Giegé et al. (2005). The very hydrophobic COX1 and NAD6 proteins, whose transcripts are strongly reduced in *rpoTmp*, do probably not run as clear bands and cannot be distinguished in the autoradiogram. The decrease in translation of these proteins cannot be addressed by the in organello protein synthesis assay.

Although contaminating bacterial protein synthesis is detected in the autoradiogram (e.g. proteins larger than ATP1), major bands are of mitochondrial origin. Protein synthesis appears enhanced in isolated mutant mitochondria. This could be because preparations of mutant mitochondria were of better quality, or it could be related to many transcripts showing elevated levels in the mutants. Mutant assays were set up before wild-type assays and briefly kept on ice until all reactions were transferred to the incubation temperature of 25°C. It is possible that labelled protein was already made in samples kept at 4°C, contributing to the increased detection of protein synthesis in mutant mitochondria.

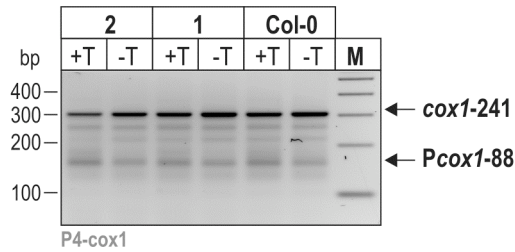

**Pcox1-88** CCGTTCCACG GGACTCTCAA GAACT**CGTAG** ACTATGGAAC CCGTT  
1 11 1 214 /8 (+T)  
1 11 1 002 /7 (-T)

**Supplemental Figure 5. 5'-RACE analysis of *cox1* transcripts.**

5'-RACE was performed as detailed in Figure 6, and products obtained from TAP-treated (+T) and untreated RNA (-T) were separated on agarose gels alongside a molecular weight marker (M). Products from transcript 5' ends are labelled with the name of the corresponding promoter or processing site as listed in Table I. The reverse primer used for amplification is indicated below the gel image.

Transcript 5' termini were analyzed through cloning and sequencing of marked 5'-RACE products. The part of the *cox1* upstream sequence that surrounds the identified TSS is shown, with the CGTA tetranucleotide, which is frequently associated with mitochondrial promoters, printed bold. Numbers written below nucleotide positions indicate frequencies of clones that were found in the wild type to correspond to transcript 5' ends mapping to the respective positions (row +T, clone numbers for products of 5'-RACE following TAP treatment; row -T, clone numbers determined without TAP treatment). Numbers behind slashes indicate the numbers of clones that were sequenced in total for a promoter. The TSS, which gave rise to a TAP-specific 5'-RACE product, is indicated by a bent arrow.

The *cox1* promoter P*cox1*-355 has been characterized previously; no detailed mapping was therefore done on wild-type transcripts mapping to this site.

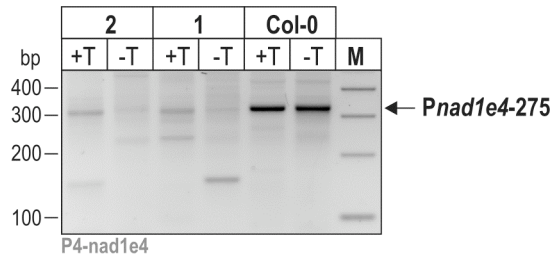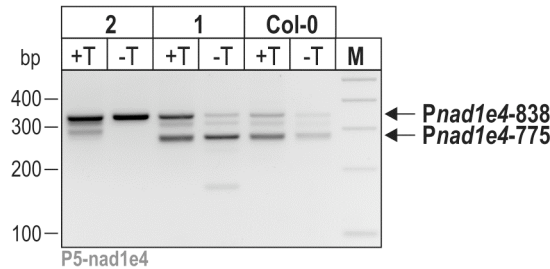

|                    |                                            |                          |                                                                                                                                                                                                                                                             |                      |
|--------------------|--------------------------------------------|--------------------------|-------------------------------------------------------------------------------------------------------------------------------------------------------------------------------------------------------------------------------------------------------------|----------------------|
| <b>Pnad1e4-275</b> | AATTTTCGGA ATCTACAAAA ACAT <b>TCT</b> AGG  | AAAGGGCTCG TAATG         |                                                                                                                                                                            |                      |
|                    |                                            |                          |                                                                                                                                                                                                                                                             | 6 2 2 / 10 (+T)      |
|                    | 1 1 1                                      |                          |                                                                                                                                                                                                                                                             | 12 11 / 8 (-T)       |
| <b>Pnad1e4-775</b> | TCATAGAACC GATCGACTGC TAT <b>TCT</b> AAGAG | AAGATAAGTA GTTCT         |                                                                                                                                                                           |                      |
|                    |                                            |                          |                                                                                                                                                                                                                                                             | 4 3 2 / 9 (+T)       |
|                    |                                            |                          |                                                                                                                                                                                                                                                             | 7 0 7 1 / 15 (-T)    |
| <b>Pnad1e4-838</b> | GGTGCTACGA GATGGCAATT TAT <b>CGT</b> A TAG | <u>A</u> AGAATAGAT CCGTG |    |                      |
|                    |                                            |                          |                                                                                                                                                                                                                                                             | 3 1 6 2 / 12 (+T)    |
|                    |                                            |                          |                                                                                                                                                                                                                                                             | 0 0 0 12 1 / 13 (-T) |

### Supplemental Figure 6. 5'-RACE analysis of *nad1e4* transcripts.

5'-RACE was performed as detailed in Figure 6, and products obtained from TAP-treated (+T) and untreated RNA (-T) were separated on agarose gels alongside a molecular weight marker (M). Products from transcript 5' ends are labelled with the name of the corresponding promoter or processing site as listed in Table I. The reverse primer used for amplification is indicated below the gel image. No signal is seen in the displayed 5'-RACE experiments for *Pnad1e4-775* in *rpoTmp-2* but has been detected in replicates of this experiment (not shown).

Transcript 5' termini were analyzed through cloning and sequencing of marked 5'-RACE products. The part of the *nad1e4* upstream sequence that surrounds the identified TSS is shown, with the TCTA and CGTA tetranucleotides, which are found associated with mitochondrial promoters, printed bold. Numbers written below nucleotide positions indicate frequencies of clones that were found in the wild type to correspond to transcript 5' ends mapping to the respective positions (row +T, clone numbers for products of 5'-RACE following TAP treatment; row -T, clone numbers determined without TAP treatment). Numbers behind slashes indicate the numbers of clones that were sequenced in total for a promoter. The TSS, which gave rise to a TAP-specific 5'-RACE product, is indicated by a bent arrow; the triangle corresponds to the site of a likely processed end.

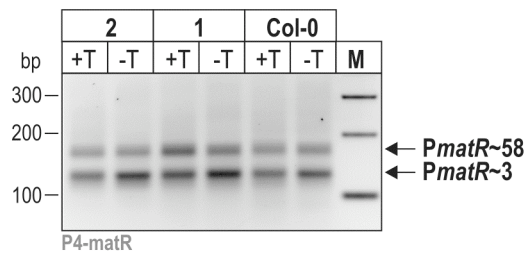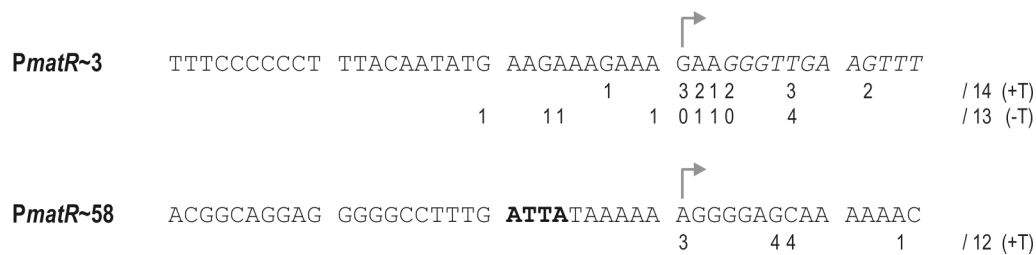

### Supplemental Figure 7. 5'-RACE analysis of *matR* transcripts.

5'-RACE was performed as detailed in Figure 6, and products obtained from TAP-treated (+T) and untreated RNA (-T) were separated on agarose gels alongside a molecular weight marker (M). Products from transcript 5' ends are labelled with the name of the corresponding promoter or processing site as listed in Table I. The reverse primer used for amplification is indicated below the gel image.

Transcript 5' termini were analyzed through cloning and sequencing of marked 5'-RACE products. The part of the *matR* upstream sequence that surrounds the suggested TSS is shown, with the ATTA tetranucleotide, which is frequently associated with mitochondrial promoters, printed bold. Numbers written below nucleotide positions indicate frequencies of clones that were found in the wild type to correspond to transcript 5' ends mapping to the respective positions (row +T, clone numbers for products of 5'-RACE following TAP treatment; row -T, clone numbers determined without TAP treatment). Numbers behind slashes indicate the numbers of clones that were sequenced in total for a promoter.

The identified *matR* 5' ends were highly diverse and showed no differences between TAP-treated and untreated samples in gel images. A TAP-specific 5' end was detected mapping to position -3 in a highly A-rich sequence stretch; yet, because of the diversity of ends mapping to positions immediately upstream of the annotated MATR coding region (coding nucleotides are italicized), transcription initiation at position -3 is not certain.

No transcripts mapping to PmatR-58 were analyzed from RNA not exposed to TAP. This site is considered a putative promoter because of its ATTA element and the generally A/T-rich sequence.





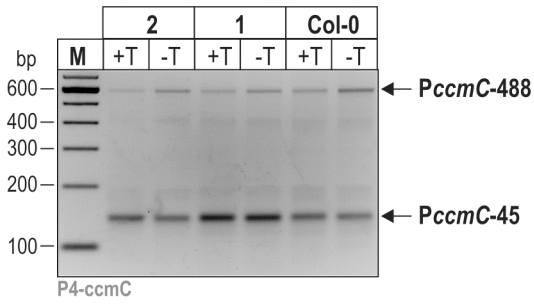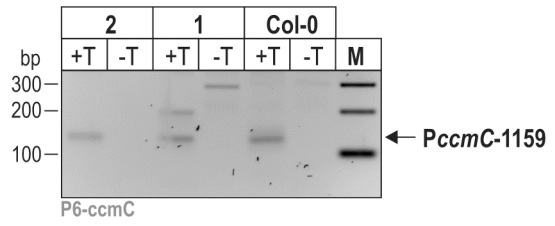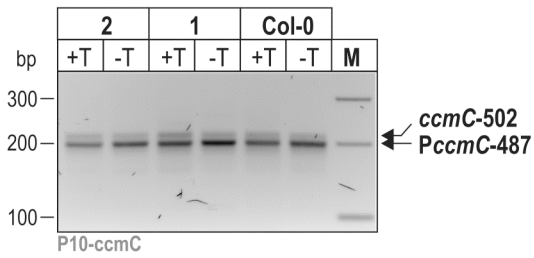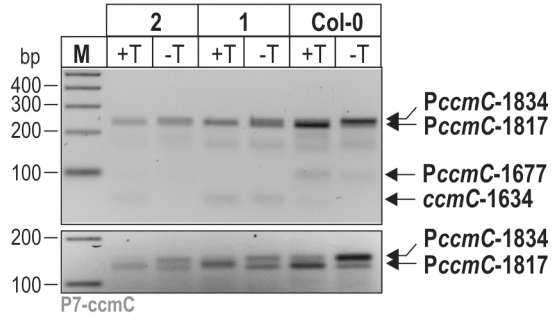

**PccmC-45** GTTGGGGGAA ATCCTTTGAT TGC**CGTATTA**T AGATCCATGT CTTTC  
 4 2 1 8 1 / 16 (+T)  
 0 2 5 2 3 1 1 / 15 (-T)

**PccmC-487** ATGAGTTGAT CGATATCGAT CGG**CGTA**AGA AAAGATTCTA CTATC  
 -502  
 1 1 12 12 6 3 / 17 (+T)  
 1 1 3 0 2 1 1 3 3 1 / 16 (-T)

**PccmC-1159** CAGCTAATCA ATTGATTCGT CAT**GGTA**GAG AAGAAAAACG GCGCA  
 6 / 6 (+T)

**PccmC-1677** CTTTCCTTC TGGCTACCAA ACGTGCTAAT AAAAGAGCTT ATTCT  
 8 1 / 9 (+T)  
 0 0 5 2 / 7 (-T)

**PccmC-1817** TACTATATAA GATAAGTAAT TC**ATTA**TAAG ATA**AGTA**AATT CATTG  
 1 3 9 / 13 (+T)  
 0 0 4 2 2 / 8 (-T)

**PccmC-1834** CGAAGAGAAG GTTACACTAC TATATAAGAT AAGTAATTCA TTATA  
 2 / 2 (+T)  
 1 4 1 / 6 (-T)

**Supplemental Figure 9.** 5'-RACE analysis of *ccmC* transcripts.

5'-RACE was performed as detailed in Figure 6, and products obtained from TAP-treated (+T) and untreated RNA (-T) were separated on agarose gels alongside a molecular weight marker (M). Products from transcript 5' ends are labelled with the name of the corresponding promoter or processing site as listed in Table I. The reverse primer used for amplification is indicated below the gel image.

Transcript 5' termini were analyzed through cloning and sequencing of marked 5'-RACE products. The part of the *ccmC* upstream sequence that surrounds the identified TSS or putative TSS is shown; tetranucleotide elements that are frequently associated with mitochondrial promoters are printed bold. Numbers written below nucleotide positions indicate frequencies of clones that were found in the wild type to correspond to transcript 5' ends mapping to the respective positions (row +T, clone numbers for products of 5'-RACE following TAP treatment; row -T, clone numbers determined without TAP treatment). Numbers behind slashes indicate the numbers of clones that were sequenced in total for a promoter. The TSS and putative TSS are indicated by bent arrows.

While no differences were seen in *PccmC-45* 5'-RACE gel patterns between +TAP and -TAP samples, sequencing of cloned 5'-RACE products identified a 5' end that was exclusive to TAP-treated RNA and therefore represents a primary end.

No major TAP-specific 5' end was found for *PccmC-487*, which showed a variety of ends and putative upstream (position -502) and downstream (triangle; this 5' end has also been mapped by Forner et al. 2007). Because of the presence of a CGTA tetranucleotide, *PccmC-487* might function as TSS despite the lack of experimental proof.

No products mapping to *PccmC-1159* were amplified from -TAP samples, identifying this site as a TSS.

Sequencing of products mapping to *PccmC-1677* and *PccmC-1817* detected TAP-specific, and therefore primary, transcript 5' ends.

Transcripts mapping to position -1834 appear as processed transcripts in gel patterns, and sequencing of cloned 5' ends was insufficient to support these transcripts being primary. However, because the region is A/T-rich, *PccmC-1834* is suggested as a putative TSS.



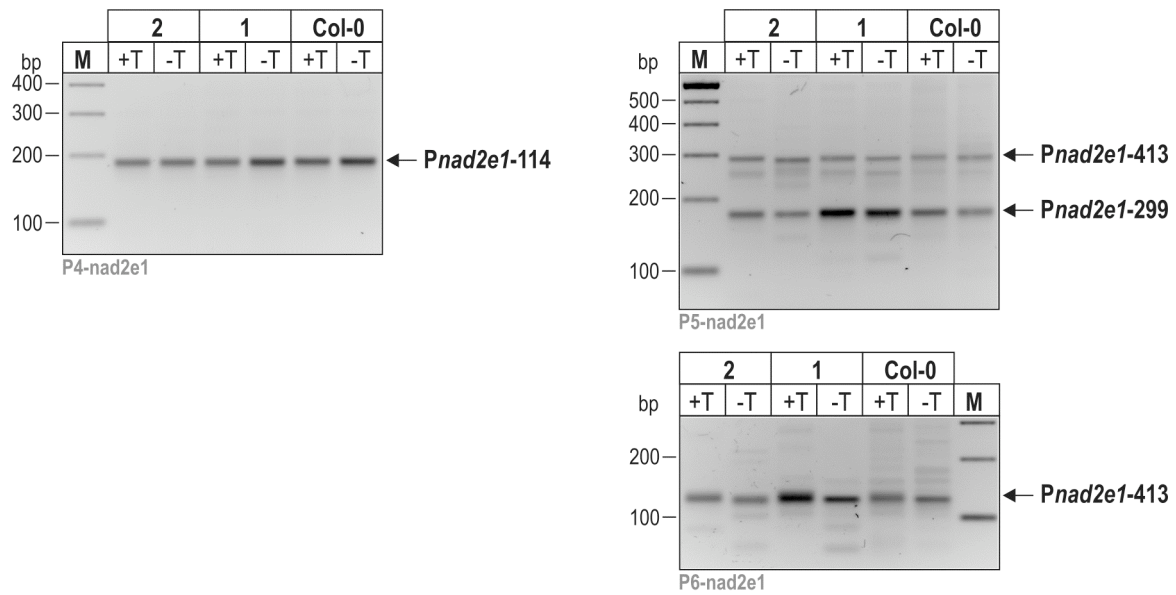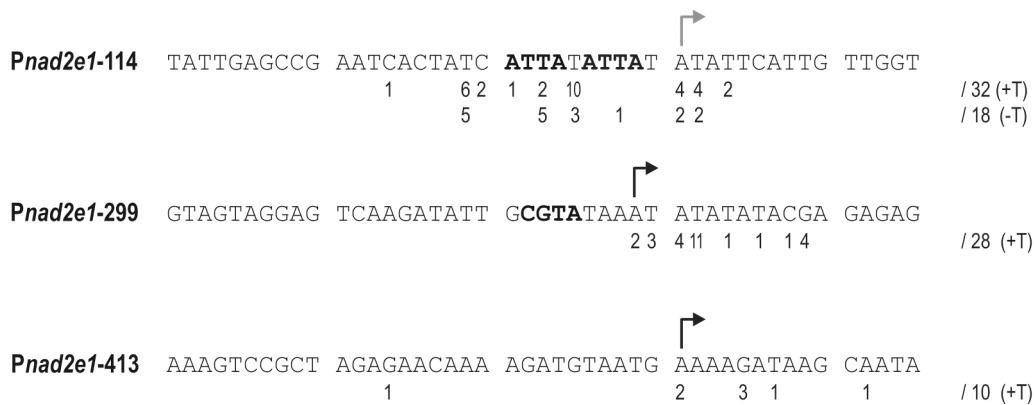

### Supplemental Figure 11. 5'-RACE analysis of *nad2e1\_e2* transcripts.

5'-RACE was performed as detailed in Figure 6, and products obtained from TAP-treated (+T) and untreated RNA (-T) were separated on agarose gels alongside a molecular weight marker (M). Products from transcript 5' ends are labelled with the name of the corresponding promoter or processing site as listed in Table I. The reverse primer used for amplification is indicated below the gel image.

Transcript 5' termini were analyzed through cloning and sequencing of marked 5'-RACE products. The part of the *nad2e1* upstream sequence that surrounds the identified TSS and putative TSS is shown, with the ATTA and CGTA tetranucleotides, which are frequently associated with mitochondrial promoters, printed bold. Numbers written below nucleotide positions indicate frequencies of clones that were found in the wild type to correspond to transcript 5' ends mapping to the respective positions (row +T, clone numbers for products of 5'-RACE following TAP treatment; row -T, clone numbers determined without TAP treatment). Numbers behind slashes indicate the numbers of clones that were sequenced in total for a promoter. The TSS, or putative TSS in the case of *Pnad2e1-114*, is indicated by a bent arrow.

Among the highly diverse products mapping to the sequence surrounding position -114, no TAP-specific products were identified. Because the site shows promoter-like sequence elements, we have listed *Pnad2e1-114* as a putative promoter.

For *Pnad2e1-299* and *Pnad2e1-413*, products in lanes marked +T are migrating more slowly than products in lanes -T, which is typical for primary transcripts that are post-transcriptionally clipped at the 5' ends by a few nucleotides (compare Supplemental Figure 9). We therefore did not sequence cloned 5'-RACE products from RNA not treated with TAP.

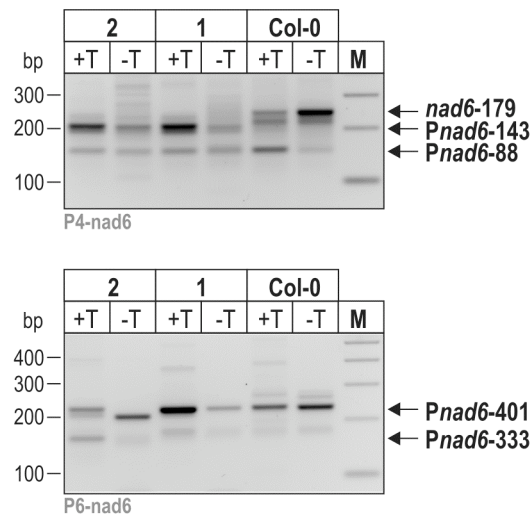

|                  |                                          |   |                  |                    |
|------------------|------------------------------------------|---|------------------|--------------------|
| <b>Pnad6-88</b>  | GAAGGGCTTG GAAGAAGAAA ATGAAATAGG         |   | AACAACCGCG CTGGT |                    |
|                  |                                          |   |                  | 2 10 3 1 / 16 (+T) |
|                  |                                          | 1 | 0 1 4 1          | / 7 (-T)           |
| <b>Pnad6-143</b> | ATTAAATGGA TGCATTGAGA TT <b>CGTA</b> AGT |   | AACTCAGTGA GTGCT |                    |
|                  |                                          |   | 9 4 2 1          | / 16 (+T)          |
| <b>Pnad6-333</b> | TGATTTACTG CGCGATGATT ATGTTGAAAA         |   | AGATCGAAGC CGCGG |                    |
|                  |                                          |   | 8                | / 8 (+T)           |
|                  |                                          |   | 0 7              | / 7 (-T)           |
| <b>Pnad6-401</b> | GATCATATTC ACGCGGGTAC <b>AGTAGTAGGT</b>  |   | AAACTTGAAG GAGAC |                    |
|                  |                                          |   | 18               | / 19 (+T)          |
|                  |                                          |   | 2 6              | / 8 (-T)           |

### Supplemental Figure 12. 5'-RACE analysis of *nad6* transcripts.

5'-RACE was performed as detailed in Figure 6, and products obtained from TAP-treated (+T) and untreated RNA (-T) were separated on agarose gels alongside a molecular weight marker (M). Products from transcript 5' ends are labelled with the name of the corresponding promoter or processing site as listed in Table I. The reverse primer used for amplification is indicated below the gel image.

Transcript 5' termini were analyzed through cloning and sequencing of marked 5'-RACE products. The part of the *nad6* upstream sequence that surrounds the identified TSS is shown, with the CGTA, AGTA and GGTA tetranucleotides, which are frequently associated with mitochondrial promoters, printed bold. Numbers written below nucleotide positions indicate frequencies of clones that were found in the wild type (in *rpoTmp-2* for *Pnad6-333* and *Pnad6-143*) to correspond to transcript 5' ends mapping to the respective positions (row +T, clone numbers for products of 5'-RACE following TAP treatment; row -T, clone numbers determined without TAP treatment). Numbers behind slashes indicate the numbers of clones that were sequenced in total for a promoter. The TSS, which gave rise to a TAP-specific 5'-RACE product, is indicated by a bent arrow.

Products mapping to *Pnad6-333* were not detected in the wild type or *rpoTmp-1* but only in *rpoTmp-2*. The discrepancy between the two mutant lines, and also between *rpoTmp-2* and the wild type, could be due to very low abundance of the *Pnad6-333* 5' end. The apparent difference at *Pnad6-333* between *rpoTmp-2* and the wild type is therefore considered insignificant.

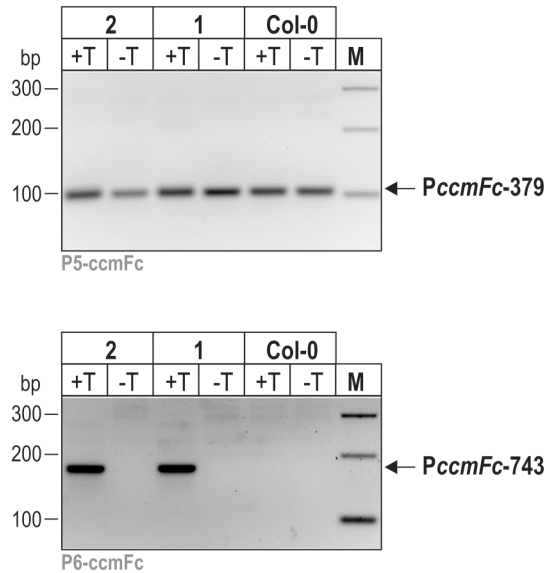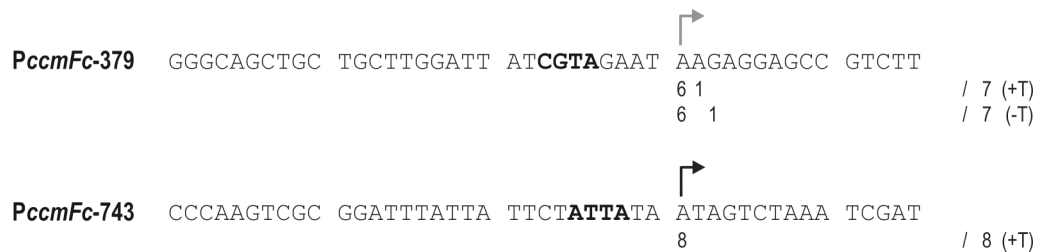

**Supplemental Figure 13.** 5'-RACE analysis of *ccmFc* transcripts.

5'-RACE was performed as detailed in Figure 6, and products obtained from TAP-treated (+T) and untreated RNA (-T) were separated on agarose gels alongside a molecular weight marker (M). Products from transcript 5' ends are labelled with the name of the corresponding promoter or processing site as listed in Table I. The reverse primer used for amplification is indicated below the gel image.

Transcript 5' termini were analyzed through cloning and sequencing of marked 5'-RACE products. The part of the *ccmFc* upstream sequence that surrounds the identified TSS and putative TSS is shown, with the ATTA and CGTA tetranucleotides, which are frequently associated with mitochondrial promoters, printed bold. Numbers written below nucleotide positions indicate frequencies of clones that were found in the wild type (in *rpoTmp-2* for *PccmFc-743*) to correspond to transcript 5' ends mapping to the respective positions (row +T, clone numbers for products of 5'-RACE following TAP treatment; row -T, clone numbers determined without TAP treatment). Numbers behind slashes indicate the numbers of clones that were sequenced in total for a promoter. The TSS, or putative TSS in the case of *PccmFc-379*, is indicated by a bent arrow. Among the products mapping to the sequence surrounding position -379, no TAP-specific products were identified. Because the site shows promoter-like sequence elements, we have listed *PccmFc-379* as a putative promoter.

TAP-specific products mapping to *PccmFc-743* were consistently detected in mutants but not in the wild type. Although this indicates that *PccmFc-743* is inactive in the wild type, we are unsure if this is truly the case, or if technical difficulties prevent its detection.

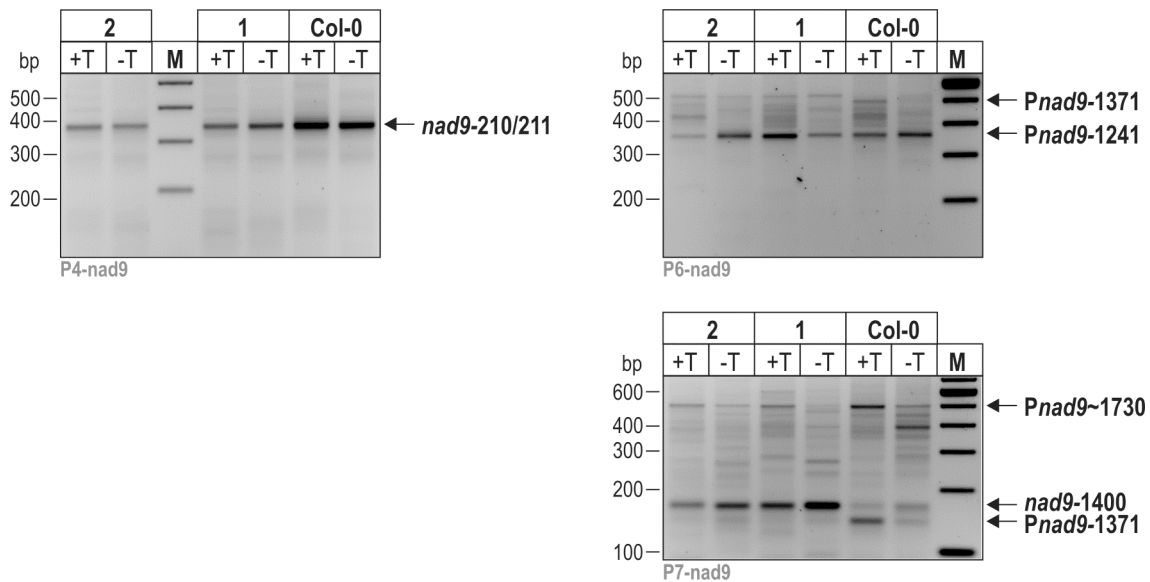

|                            |                                           |    |             |   |       |          |
|----------------------------|-------------------------------------------|----|-------------|---|-------|----------|
| <b><i>nad9-211/210</i></b> | GTCCAATATG GCAGGCGATC CACGAATTTG          | ▽▽ | ATCATTCGCT  | ▽ | TTCAA |          |
|                            |                                           |    | 1 2 1 1     | 3 |       | / 8 (+T) |
| <b><i>Pnad9-1241</i></b>   | TATATCCGAA ACGTACGAAA TAT <b>AGTA</b> AAT | └┐ | ATCGTAAAGG  |   | CAGAT |          |
|                            |                                           |    | 3           |   |       | / 3 (+T) |
| <b><i>Pnad9-1371</i></b>   | AGCATAGAAA AACTTCTCGT AATGTATTTA          | └┐ | ACCATAAAAAT |   | CGATT |          |
|                            |                                           |    | 2 5         |   | 1     | / 8 (+T) |
| <b><i>nad9-1400</i></b>    | AGCAGAAAAA GCTCAAATA AATGCTATAA           | ▽  | GCATAGAAAA  |   | ACTTC |          |
|                            |                                           |    | 1 1         |   | 1     | / 3 (+T) |
| <b><i>Pnad9~1730</i></b>   | AGGTGGGATA GAAGAATTGA TAA <b>GGTA</b> AAT | └┐ | AGATATGATG  |   | ATAGA |          |

#### Supplemental Figure 14. 5'-RACE analysis of *nad9* transcripts.

5'-RACE was performed as detailed in Figure 6, and products obtained from TAP-treated (+T) and untreated RNA (-T) were separated on agarose gels alongside a molecular weight marker (M). Products are labelled with the name of the corresponding promoter or processing site as listed in Table I. The reverse primer used for 5'-RACE is indicated below the gel image.

Transcript 5' termini were analyzed through cloning and sequencing of marked 5'-RACE products. The part of the *nad9* upstream sequence that surrounds the identified TSS or putative TSS is shown; tetranucleotide elements that are frequently associated with mitochondrial promoters are printed bold. Numbers written below nucleotide positions indicate frequencies of clones that were found in the wild type to correspond to transcript 5' ends mapping to the respective positions when amplified from TAP-treated RNA. Numbers behind slashes indicate the numbers of clones that were sequenced in total for a promoter. The TSS and putative TSS are indicated by bent arrows. *nad9* transcript 5' ends were not characterized in as much detail as those of other genes in this study; therefore only *Pnad9-1371* which shows a TAP-specific product in 5'-RACE gel patterns can be considered an experimentally verified promoter. The putative promoter *Pnad9~1730* has been inferred from the length of a TAP-specific 5'-RACE product corresponding to a promoter-like sequence in the *nad9* upstream region; no sequencing of 5'-RACE products was done. The grey filled triangle marks a *nad9* 5' end determined by Forner et al. (2007).

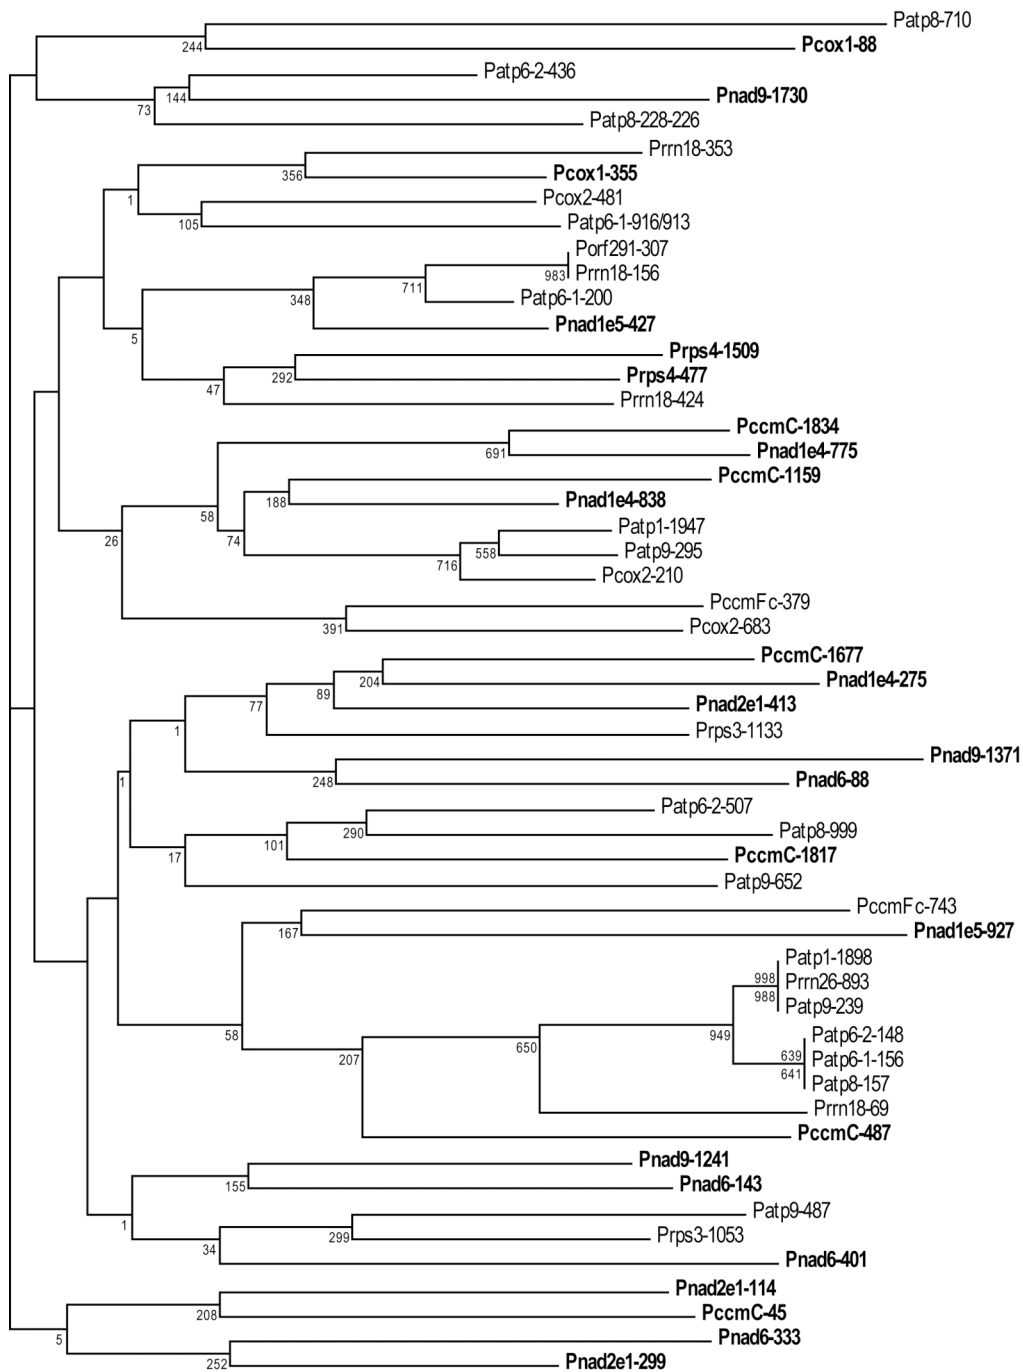

**Supplemental Figure 15.** Neighbor joining distance tree of mitochondrial promoter sequences in *Arabidopsis*.

The tree has been generated from promoter sequences aligned with respect to their TSS, as displayed in Figure 9, using ClustalW (Thompson, J.D., Higgins, D.G., and Gibson, T.J. (1994). CLUSTAL W: improving the sensitivity of progressive multiple sequence alignment through sequence weighting, position-specific gap penalties and weight matrix choice. *Nucleic Acids Res* 22, 4673-4680). Bootstrap values are based on 1000 bootstrap repetitions. Sequences spanning 18 nucleotides, from position -14 to +4 around the TSS, have been analysed. This corresponds to the region required for promoter function in dicot plant mitochondria, as defined by Dombrowski et al. (2008). Promoters of genes showing reduced transcription in *rpoTmp* mutants are printed bold; they do not cluster as an obvious subgroup. Deriving a tree from an alignment of mitochondrial promoters generated by ClustalW, which ignored the positions of TSS, did similarly not result in clustering of *rpoTmp*-affected promoters (not shown).



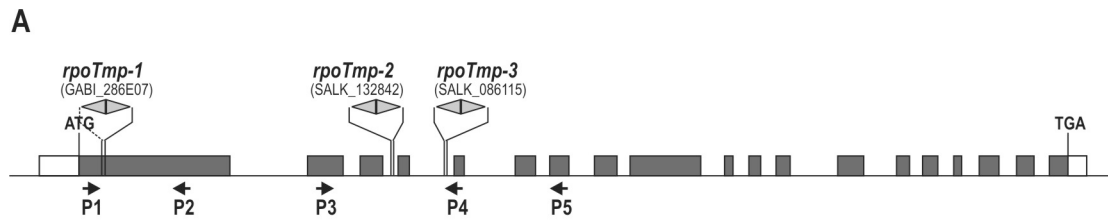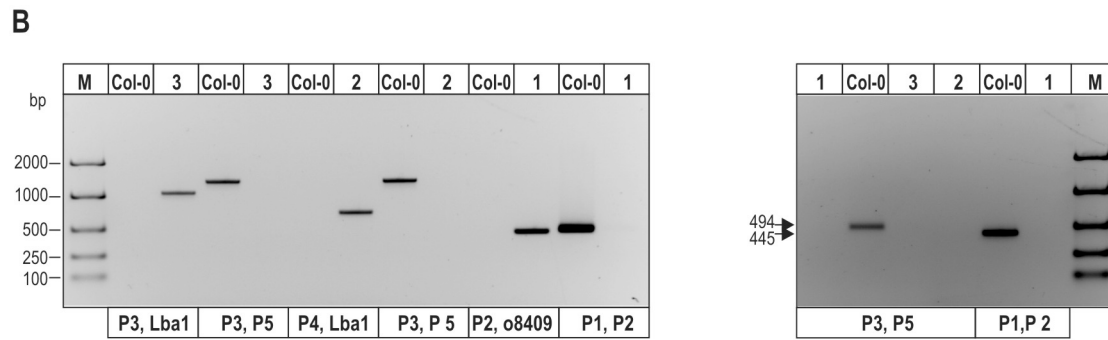

**C**

| Primer | Sequence (5'→3')              |
|--------|-------------------------------|
| P1     | TAAACAAGCAATTTTCGAGGTCAG      |
| P2     | AGCAGCTCTTTCCCATTCCTTC        |
| P3     | GTTGATAAAGAAACAGAAGTTGTCAGCAG |
| P4     | AGCGACATTCACATTTCCAAC         |
| P5     | ATTTAGTACTTCCAAGCGTATCCAGG    |
| Lba1   | TGGTTCACGTAGTGGGCCATCG        |
| o8409  | ATATTGACCATCATACTCATTGC       |

**Supplemental Figure 16.** Identification of *rpoTmp* mutant lines.

(A) Annealing sites of gene-specific primers (arrows) used to verify T-DNA insertions and the absence of a wild-type *RPOTmp* allele from lines *rpoTmp-1*, *rpoTmp-2* and *rpoTmp-3*.

(B) PCR analysis of the At5g15700 locus (left gel image) in *rpoTmp-1* (lanes labelled 1), *rpoTmp-2* (2) and *rpoTmp-3* (3) and the wild type (Col-0) using gene-specific primers and T-DNA left border primers Lba1 and o8409; primer combinations are indicated below the gel. The absence of a functional *RPOTmp* mRNA in mutants was confirmed by RT-PCR (right gel image).

(C) Genotyping primer sequences.

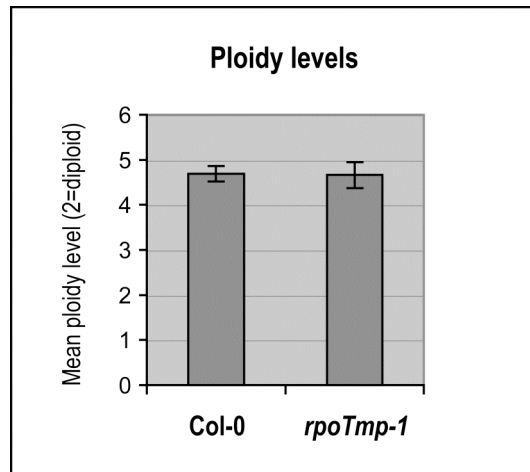

**Supplemental Figure 17.** Nuclear genome ploidy levels.

Nuclear DNA content in seven-day-old wild-type (Col-0) and *rpoTmp-1* seedlings was measured by flow cytometry as described by Zoschke et al. (2007). Error bars correspond to standard deviations (n = 4). This data was provided by E. Cincu, J. Fuchs and T. Börner.

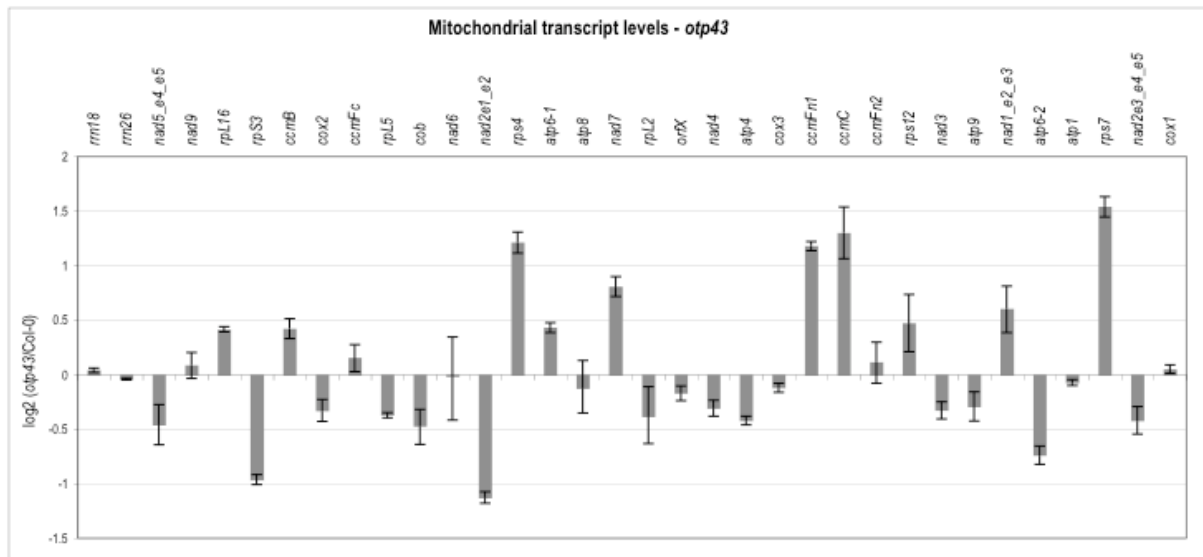

**Supplemental Figure 18.** Mitochondrial steady-state transcript levels in the *Arabidopsis otp43* mutant.

Transcript levels determined by qRT-PCR as described in the main manuscript are depicted as the log<sub>2</sub> ratio of transcript levels in *otp43* compared with levels in wild-type (Col-0) plants. The mean of *rrn18* and *rrn26* transcript levels was used for data normalization. Three technical replicates were averaged; standard errors are indicated.

**Supplemental Table 1.** Sequence motifs significantly overrepresented among promoters of genes showing reduced transcription in *rpoTmp*.

|               | <b>Motif</b>  | <b>N (subset1)</b> | <b>% (subset1)</b> | <b>N (subset2)</b> | <b>% (subset2)</b> | <b>Z</b>    |
|---------------|---------------|--------------------|--------------------|--------------------|--------------------|-------------|
| <b>6-mers</b> | AGAAGA        | 3                  | 12                 | 0                  | 0                  | 1.919558773 |
|               | AAAAGA        | 2                  | 8                  | 0                  | 0                  | 1.552169697 |
|               | AAATAT        | 2                  | 8                  | 0                  | 0                  | 1.552169697 |
|               | AAAGAT        | 2                  | 8                  | 0                  | 0                  | 1.552169697 |
|               | AATGAA        | 2                  | 8                  | 0                  | 0                  | 1.552169697 |
|               | AAGATA        | 2                  | 8                  | 0                  | 0                  | 1.552169697 |
|               | ATATTG        | 2                  | 8                  | 0                  | 0                  | 1.552169697 |
|               | ATAGAT        | 2                  | 8                  | 0                  | 0                  | 1.552169697 |
|               | ATTGCG        | 2                  | 8                  | 0                  | 0                  | 1.552169697 |
|               | ATGAAA        | 2                  | 8                  | 0                  | 0                  | 1.552169697 |
| <b>5-mers</b> | AAGAT         | 4                  | 16                 | 0                  | 0                  | 2.238570973 |
|               | GAAAA         | 4                  | 16                 | 0                  | 0                  | 2.238570973 |
|               | AAAAG         | 3                  | 12                 | 0                  | 0                  | 1.919558773 |
|               | AAGAA         | 3                  | 12                 | 0                  | 0                  | 1.919558773 |
|               | TGAAA         | 3                  | 12                 | 0                  | 0                  | 1.919558773 |
|               | TGTAA         | 3                  | 12                 | 0                  | 0                  | 1.919558773 |
|               | TCAAG         | 3                  | 12                 | 0                  | 0                  | 1.919558773 |
|               | GAAGA         | 3                  | 12                 | 0                  | 0                  | 1.919558773 |
|               | GCGTA         | 3                  | 12                 | 0                  | 0                  | 1.919558773 |
|               | GTAAA         | 4                  | 16                 | 1                  | 3.448275862        | 1.586668598 |
|               | <b>4-mers</b> | <b>GAAA</b>        | <b>6</b>           | <b>24</b>          | <b>0</b>           | <b>0</b>    |
| AAAC          |               | 4                  | 16                 | 0                  | 0                  | 2.238570973 |
| AGAT          |               | 7                  | 28                 | 2                  | 6.896551724        | 2.074874321 |
| ATCA          |               | 3                  | 12                 | 0                  | 0                  | 1.919558773 |
| TGTA          |               | 3                  | 12                 | 0                  | 0                  | 1.919558773 |
| GCGT          |               | 3                  | 12                 | 0                  | 0                  | 1.919558773 |
| CAAG          |               | 3                  | 12                 | 0                  | 0                  | 1.919558773 |
| TAGG          |               | 4                  | 16                 | 1                  | 3.448275862        | 1.586668598 |
| AATG          |               | 2                  | 8                  | 0                  | 0                  | 1.552169697 |
| AACT          |               | 2                  | 8                  | 0                  | 0                  | 1.552169697 |

N equals the number of occurrences of a given motif among the subset of promoters of genes with reduced transcript levels in *rpoTmp* (subset 1) or among the subset of promoters of genes showing unaltered or increased transcription in *rpoTmp* (subset 2).

Sequences were searched for the presence of one or more of all 4096 6-mers, 1024 5-mers and 256 4-mers of the bases A, T, G and C. The proportions  $p_1$  and  $p_2$  of sequences which contain each motif in the two datasets were compared using the two-sample z-statistic

$$z = \frac{p_1 - p_2}{\sqrt{p_p(1 - p_p)(1/n_1 + 1/n_2)}}$$

where  $p_p$  is the pooled sample proportion. Statistical significance was assessed at the 99% level ( $|z| > 2.58$ ).

Only the tetranucleotide GAAA (highlighted green) was significantly overrepresented in subset 1.

**Supplemental Table 2.** Primers used for quantitative RT-PCR analysis. Primer sequences are given in 5'→3' orientation.

| <b>Transcript</b>                            | <b>Primer 1</b>         | <b>Primer 2</b>         |
|----------------------------------------------|-------------------------|-------------------------|
| <i>nad5e4_e5</i>                             | AACATTGCAAAGGCATAATGA   | GTTCTGCGTTTTCGGATATG    |
| <i>nad9</i>                                  | GGATGACCCTCGAAACCATA    | CACGCATTTCGTGTACAAACC   |
| <i>rpl16</i>                                 | GAGCATTTGCCAAACTCACA    | CGGACACTTTTCATCGTGCTA   |
| <i>rps3</i>                                  | CCGATTTTCGGTAAGACTTGG   | AGCCGAAGGTGAGTCTCGTA    |
| <i>ccmB</i>                                  | TCTTGGGAATCACATCCAGCA   | CGAGACCGAAATTGGAAAAA    |
| <i>cox2</i>                                  | TGATGCTGTACCTGGTCGTT    | TGGGGGATTAATTGATTGGA    |
| <i>ccmFc</i>                                 | CACATGGAGGAGTGTGCATC    | GTGGGTCCATGTAAATGATCG   |
| <i>rpl5</i>                                  | AAGGGGTTTCGACAGGAAAGT   | CGTATTTTCGACCGGAAAATC   |
| <i>cob</i>                                   | TGCCGGAATGGTATTTTCTTA   | GCCAAAAGCAACCAAAACAT    |
| <i>nad6</i>                                  | TATGCCGGAAAGGTACGAAG    | GTGAGTGGGTTCAGTCGTCCT   |
| <i>nad2e1_e2</i>                             | GGATCCTCCCACACATGTTC    | GCGAGCAGAAGCAAGGTTAT    |
| <i>rps4</i>                                  | ACCCATCACAGAGATGCACA    | TCACACAAACCTTCGATGA     |
| <i>atp6-1</i>                                | TCTTTTTCGAGTCAATGCAC    | TCTCGCGTATCTCACATTGC    |
| <i>atp8</i>                                  | CCGTCGACTTATTGGGAAAA    | TTCCTTGGCCATGTACAACA    |
| <i>nad7</i>                                  | ACTGTCACTGCACAGCAAGC    | CATTGCACAATGATCCGAAG    |
| <i>nad5e1_e2</i>                             | TGGACCAAGCTACTTATGGATG  | CCATGGATCTCATCGGAAAT    |
| <i>nad1e5</i>                                | AGCCCGGGATCTTCTTGA      | ACGGAGCTGCATCCCTACT     |
| <i>matR</i>                                  | AATTTTTTTCGAGAGCTGGAA   | TTGAACCCCGTCTGTAGAC     |
| <i>nad1e4</i>                                | AAAAGAGCAGACCCCATTTGA   | GGGAGCTGTATGAGCGGTAA    |
| <i>rpl2</i>                                  | CCGAAGACGGATCAAGGTAA    | CGCAATTCATCACCATTTTG    |
| <i>orfX</i>                                  | GGGGTCTTTCTTTGGAAACC    | TCTCCCTCATTCCACTCGTC    |
| <i>nad4</i>                                  | AATACCCATGTTTCCCGAAG    | TGCTACCTCCAATTCCCTGT    |
| <i>atpB</i>                                  | GGATCAGCTTGCGAATTTGT    | GCAAATTGCTTCCCCACTAA    |
| <i>nad4L</i>                                 | GGGGAATCCTCCTTAATAGACG  | AACGAAAATGGCTAACCCAATA  |
| <i>cox3</i>                                  | CCGTAACCTTGGGCTCATCAT   | AAACCATGAAAGCCTGTTGC    |
| <i>ccmFn1</i>                                | AGCTCTTGGCATTGCTTTGT    | AGTGCCACAATCCCATTTCAT   |
| <i>ccmC</i>                                  | AGCTACGCGCAAATTTCTCAT   | GCCGTGGCGATATAAACAAT    |
| <i>ccmFn2</i>                                | CGTGTTCGTTTCGTAATGGAAA  | TGATAAGCCCACCAACTTCC    |
| <i>rpsl2</i>                                 | AGCCAAAGTACGGTTGAGCA    | TTTGGGTTTTTCTGCACCAT    |
| <i>nad3</i>                                  | CGAATGTGGTTTTTCGATCCTT  | GCACCCCTTTTTCCATTTCATA  |
| <i>atp9</i>                                  | CATTCCCTCTGACGTCGAAT    | TCGTCGATTCTTACCCTCGT    |
| <i>nad1e2_e3</i>                             | TCTGCAGCTCAAATGGTCTC    | ATTTCAGCTTCCGCTTCTGG    |
| <i>atp6-2</i>                                | TTCTGCCAGGAGTGCCTATT    | TTCTCGCTGGAGGTTCCCTAA   |
| <i>atp1</i>                                  | TCACTTTCGACACGTCCTTTGC  | GGAATGGCCTTGAATCTTGA    |
| <i>rps7</i>                                  | CTCGAACTGAACGCGATGTA    | AAGCTGCTTCAAGGATCCAA    |
| <i>nad2e2_e3_e4</i>                          | TATTTGTTCTTCGCCGCTTT    | CAAAGGAGAGGGGTATAGCAA   |
| <i>cox1</i>                                  | GTAGCTGCGGTGAAGTAGGC    | CTGCCTGGATTTCGGTATCAT   |
| <i>rm18</i>                                  | CGTCACCTGGGTCAAAAAC     | GCTTGAAAACCGAAGTGAGC    |
| <i>rm26</i>                                  | GACGAGACTTTTCGCCCTTTTG  | CCTGGAGCGAATTGGATGAT    |
| <i>nuclear 18S rma (At3g41768)</i>           | AAACGGCTACCACATCCAAG    | ACTCGAAAGAGCCCGGTATT    |
| <i>nuclear ACT2,8 (At1g49240, At3g18780)</i> | GGTAACATTGTGCTCAGTGGTGG | AACGACCTTAATCTTCATGCTGC |

**Supplemental Table 3.** Primers used for 5'-RACE.

The following oligonucleotides were used in 5'-RACE experiments for reverse transcription (application "A"), the first RACE PCR ("B") or subsequent nested PCRs ("C"). Primer sequences are given in 5'→3' orientation.

| Gene                           | Primer    | Sequence                      | Application | Detected 5' end                                                  |
|--------------------------------|-----------|-------------------------------|-------------|------------------------------------------------------------------|
| <i>cox1</i>                    | P2-cox1   | TGTGCCCCATCACTCCAG            | A           |                                                                  |
|                                | P3-cox1   | ACCGAAAATGAAATAGAGAGTCCCT     | B           |                                                                  |
|                                | P4-cox1   | TGTGGTTTGTGGAGAACAGCC         | C           | <i>Pcox1</i> -88<br><i>cox1</i> -241                             |
|                                | P5-cox1-b | ATCGTCTACAAAAGATAATGCTCTCAC   | C           | <i>Pcox1</i> -355                                                |
| <i>matR</i> ,<br><i>nad1e4</i> | P2-matR-a | GAGTGGCAGCCTTGACC             | A           |                                                                  |
|                                | P3-matR   | CGGAAATGCGATGTGTCTGG          | B           |                                                                  |
|                                | P4-matR   | TGGAAACTCGGGATCGTAAATG        | C           | <i>PmatR</i> -14<br><i>PmatR</i> -58                             |
|                                | P3-nad1e4 | CGCACCTCATTAAGATCATATTGG      | B           |                                                                  |
|                                | P4-nad1e4 | AAAAGAGCAGACCCCATTTGAAG       | C           | <i>Pnad1e4</i> -275                                              |
|                                | P5-nad1e4 | CTCTCGATGTGAGATCAGCAGC        | C           | <i>Pnad1e4</i> -775<br><i>Pnad1e4</i> -838                       |
|                                | P6-nad1e4 | CCCTTGCCCTTGAACGATAGA         | C           | <i>Pnad1e4</i> -775<br><i>Pnad1e4</i> -838<br><i>nad1e4</i> -892 |
| <i>nad1e5</i>                  | P2-nad1e5 | AAAAGACCAGAAACAGGGAC          | A           |                                                                  |
|                                | P3-nad1e5 | TTTCCGGCCAAGTCCCA             | B           |                                                                  |
|                                | P5-nad1e5 | GTCCAAGCGATAGCGTAAAAGC        | C           | <i>Pnad1e5</i> -427                                              |
|                                | P7-nad1e5 | TCAGGTCTTGACCGGGTCC           | C           | <i>Pnad1e5</i> -927                                              |
| <i>nad5e1_e2</i>               | P2-nad5e2 | GAAATCCCAAGAGCTAATCC          | A           |                                                                  |
|                                | P3-nad5e2 | AAGACCTACTCCCTCCCATCCC        | B           |                                                                  |
|                                | P4-nad5e2 | CTATGCGGATCCTCGGACA           | C           | -                                                                |
|                                | P5-nad5e1 | CGAAGAGAATGAAACGCACGTAG       | C           | -                                                                |
| <i>nad2e1_e2</i>               | P2-nad2e1 | AAGTAATCCAAGCCAACCC           | A           |                                                                  |
|                                | P3-nad2e1 | TCCAAGCCAACCCACATTACTG        | B           |                                                                  |
|                                | P4-nad2e1 | GTGGGAGGATCCGAACGA            | C           | <i>Pnad2e1</i> -114                                              |
|                                | P5-nad2e1 | GAAAAGAAAGGGCGGAATAGCA        | C           | <i>Pnad2e1</i> -297<br><i>Pnad2e1</i> -413/409                   |
| <i>nad6</i>                    | P2-nad6   | CGCAATACTTCTTCGTGAA           | A           |                                                                  |
|                                | P3-nad6   | GATGGGAAACAAAACGGAATGT        | B           |                                                                  |
|                                | P4-nad6   | GACCAAAGCAGGGCTCGAC           | C           | <i>Pnad6</i> -88<br><i>Pnad6</i> -143<br><i>nad6</i> -179        |
|                                | P7-nad6   | AGCACTCACTGAGTTACTTACGGAATC   | C           | <i>nad6</i> -179                                                 |
|                                | P6-nad6   | CACGGAGCGGTAGACTGAACAC        | C           | <i>Pnad6</i> -333<br><i>Pnad6</i> -401                           |
|                                | P5-nad6   | AAACCAACAATCTGCACGCTTAG       | C           | -                                                                |
| <i>nad9</i>                    | P2-nad9   | AAAGCACAACAATTGAAATAGGT       | A           |                                                                  |
|                                | P3-nad9   | TGAAATAGGTAGTCCGTATTGGTATCAG  | B           |                                                                  |
|                                | P4-nad9   | CGTATTGGTATCAGATCTATTTCCCATGT | C           | <i>nad9</i> -211/210                                             |
|                                | P6-nad9   | TTTGCCAAACTCACACCATCC         | C           | <i>nad9</i> -1241                                                |
|                                | P7-nad9   | TTCCGATATAGCACGTCTCCCT        | C           | <i>Pnad9</i> -1371<br><i>nad9</i> -1400<br><i>Pnad9</i> ~1730    |
| <i>rps4</i>                    | P2-rps4-b | GTTTTGTTTCCTCTGTGCATC         | A           |                                                                  |
|                                | P3-rps4-b | TGCGGCGTTGTATTATTGTCTAGT      | B           |                                                                  |
|                                | P4-rps4-b | CAAGTTTGAAATCTTAATGGGGACA     | C           | <i>rps4</i> +2                                                   |
|                                | P5-rps4   | CATGACTCGACCTTTAGTTTTGTGAC    | C           | <i>Prps4</i> -477                                                |
|                                | P7-rps4   | GAAAAGGTCGGGACAGTGGC          | C           | <i>Prps4</i> -1509                                               |
| <i>ccmC</i>                    | P2-ccmC-a | AGCGAAGATAAAGGGGATG           | A           |                                                                  |
|                                | P2-ccmC-a | AGCGAAGATAAAGGGGATG           | A           |                                                                  |

|              |          |                           |   |                                                                                     |
|--------------|----------|---------------------------|---|-------------------------------------------------------------------------------------|
|              | P3-ccmC  | TGTTAAGAACAACCAAGACCCAATG | B |                                                                                     |
|              | P4-ccmC  | AATGAGAATTTGCGCGTAGCTT    | C | <i>PccmC</i> -45                                                                    |
|              | P10-ccmC | CGGGAAGATCATAGCGAAGAAG    | C | <i>PccmC</i> -488/484                                                               |
|              | P5-ccmC  | TGCTGCAAAAAGACTGGGATG     | B |                                                                                     |
|              | P6-ccmC  | GGGATGGGAAAACAAAACAGAATG  | C | <i>PccmC</i> -1159                                                                  |
|              | P7-ccmC  | CAGAACAAAGCAGGTAGACCAAGC  | C | <i>ccmC</i> -1634<br><i>PccmC</i> -1677<br><i>PccmC</i> -1811<br><i>PccmC</i> -1834 |
| <i>ccmFc</i> | P2-ccmFc | TGAAGAACGGGAACGAA         | A |                                                                                     |
|              | P3-ccmFc | TCCACTTTTTGCTCCGTCCA      | B |                                                                                     |
|              | P4-ccmFc | CCATTTCAATAGTACGGGTGCTG   | C | <i>ccmFc</i> -124                                                                   |
|              | P5-ccmFc | ACGAGTAGGTAGGCGGCATCT     | C | <i>PccmFc</i> -379                                                                  |
|              | P6-ccmFc | TAGGAATCTTAGGTTACCTCCAGCC | C | <i>PccmFc</i> -743                                                                  |

**Supplemental Table 4.** Gene-specific primers used to amplify DNA probes for the detection of mitochondrial run-on transcripts.

Primer sequences are given in 5'→3' orientation.

| <b>Transcript</b> | <b>Primer 1</b>           | <b>Primer 2</b>         |
|-------------------|---------------------------|-------------------------|
| <i>rm26</i>       | TCACCGAAGCGACGAGACC       | ACTCGCGACTATGGCAGGG     |
| <i>rps3</i>       | CTTTCTACGGCGGGGTCACT      | CGTCATTTTCTATCAGGAACGCT |
| <i>ccmFc</i>      | TTTATGGTCGTGCCTTGTGG      | TTCGTCGTTGCTCATTCCC     |
| <i>nad6</i>       | TCGACTTTTCATGCTGAAGCAAG   | CATTTTCGTCGGAATACATCCTG |
| <i>nad2e1_e2</i>  | CTAATAACCTTGCTTCTGCTCGC   | TGTCCGGTCGTACCCAAAC     |
|                   | TTCTTAGCCGTCGCCTAGAGT     | TCCAAGCCAACCCACATTACTG  |
| <i>rps4</i>       | TCAAAATGTGGCGGAGCTAGA     | TCTCTTGTGCTCAGCGAAGGA   |
| <i>atp6-1</i>     | CAATTAATCCAATATGCGACGAATC | TGAAAGGCTTCCCCGGATAC    |
| <i>cox1</i>       | TTCCAGGAAAAGCGCGAGAG      | ATACCGAATCCAGGCAGAATGAG |
| <i>rm26</i>       | TCACCGAAGCGACGAGACC       | ACTCGCGACTATGGCAGGG     |
| <i>rps3</i>       | CTTTCTACGGCGGGGTCACT      | CGTCATTTTCTATCAGGAACGCT |
| <i>ccmFc</i>      | TTTATGGTCGTGCCTTGTGG      | TTCGTCGTTGCTCATTCCC     |
